# Supplementary material for: Haplotypes for Type, Degree, and Rate of Marbling in Cattle Are Syntenic with Human Muscular Dystrophy
Source: Hindawi journal article supplement (doi:10.1155/2017/6532837), 2017-01-01

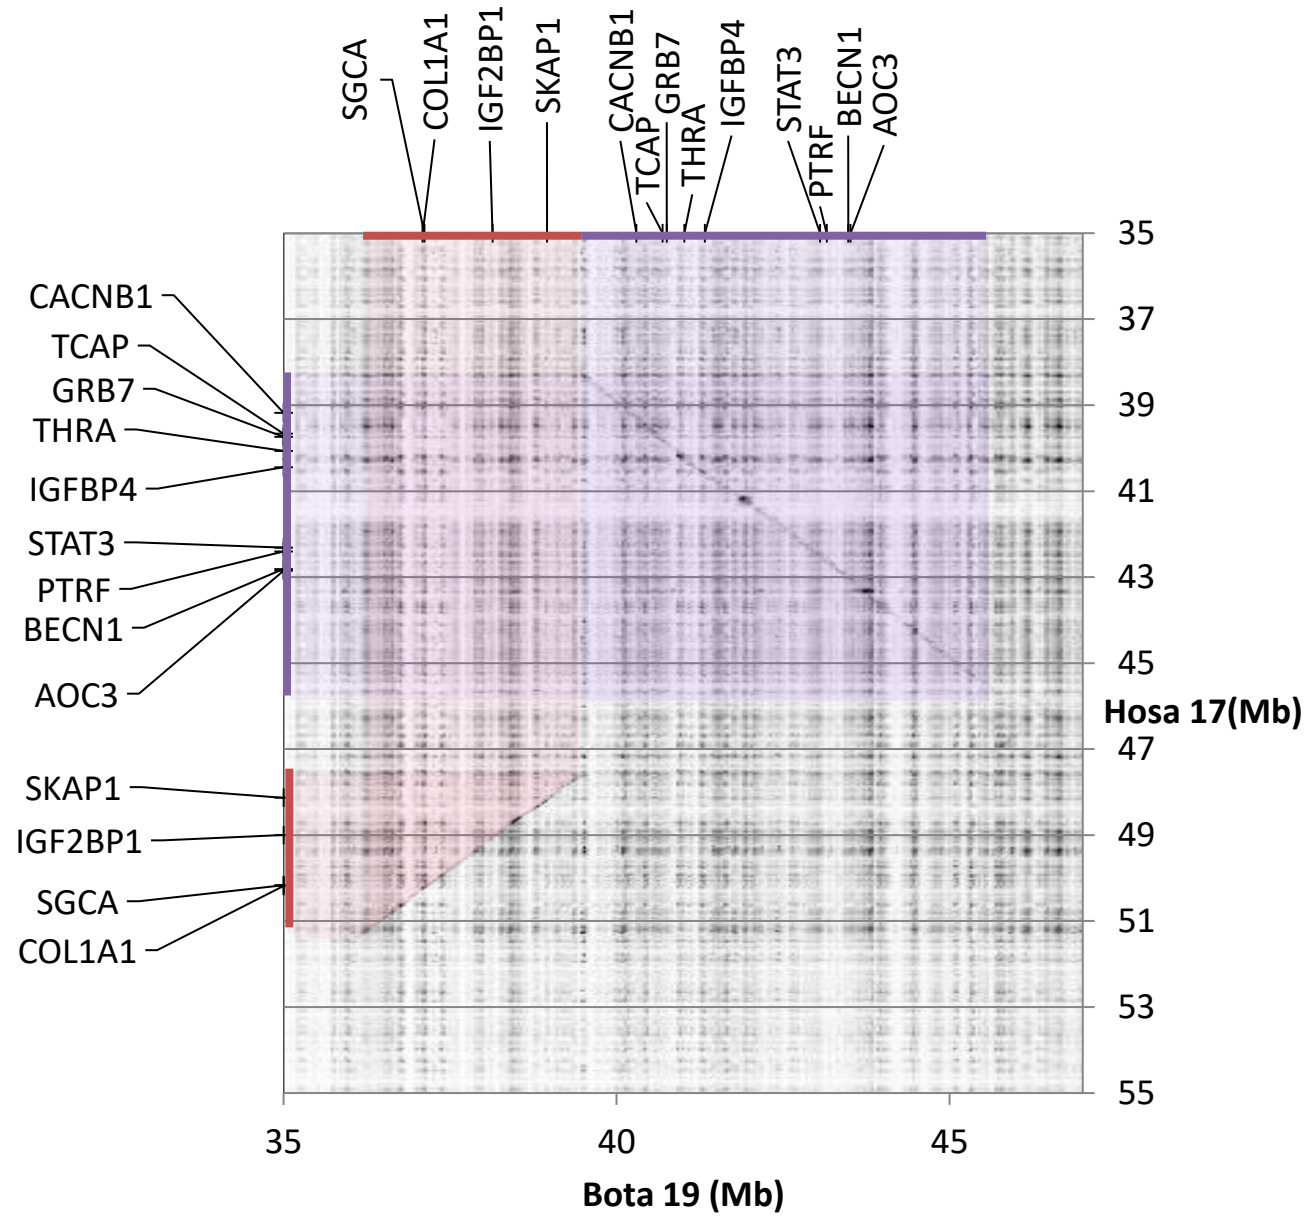

Supplement: f2 [file 6532837.f2.pdf]
